# Supplementary material
Source: PubMed Central journal article supplement (PMC1316276)
Supplement: bj3920399add.pdf [file bj3920399add.pdf]

**Supplemental Table 1. Comparison of amino acid contents between control and MNPE-treated horse cyt c.** Cyt c that was pretreated with or without MNPE was dialyzed in water and hydrolyzed in 11.5 N HCl at 110 °C for 24 h. Amino acid analysis of the hydrolysate was performed. Relative contents to Ala whose number is 6 in horse cyt c are shown.

| Amino acid       | Theoretical | Control | 1 mM MNPE | 5 mM MNPE |
|------------------|-------------|---------|-----------|-----------|
| Gly              | 12          | 13.0    | 12.7      | 12.8      |
| Ala              | 6           | 6.0     | 6.0       | 6.0       |
| Val              | 3           | 3.0     | 3.0       | 3.1       |
| Leu              | 6           | 6.6     | 6.0       | 6.2       |
| Ile              | 6           | 6.0     | 6.0       | 6.1       |
| Phe              | 4           | 4.0     | 3.8       | 3.9       |
| Ser              | 0           | 0       | 0         | 0         |
| Thr              | 10          | 9.1     | 8.9       | 8.9       |
| Tyr              | 4           | 3.9     | 3.8       | 3.8       |
| Trp              | 1           | 0       | 0         | 0         |
| Cys <sup>a</sup> | 2           | 0.8     | 0.9       | 0.9       |
| Met              | 2           | 2.0     | 1.9       | 1.9       |
| Lys              | 19          | 20.9    | 20.7      | 21.4      |
| Arg              | 2           | 2.0     | 2.1       | 2.1       |
| His              | 3           | 3.1     | 2.9       | 2.8       |
| Asx <sup>b</sup> | 8           | 8.4     | 8.2       | 8.2       |
| Glx <sup>c</sup> | 12          | 9.0     | 8.7       | 8.7       |
| Pro              | 4           | 3.7     | 4.1       | 4.1       |
| Sum              | 104         | 101.5   | 99.7      | 100.9     |

<sup>a</sup>Cys binds covalently to heme in cyt c.

<sup>b</sup>Sum of Asp and Asn.

<sup>c</sup>Sum of Glu and Gln.
